# Supplementary material
Source: PubMed Central journal article supplement (PMC7191166)
Supplement: ajtr0012-1184-f11.pdf [file ajtr0012-1184-f11.pdf]

## A nine-immune gene signature in hepatocellular carcinoma

**Table S1.** Primers used for the qPCR of the target and reference genes

| Gene          | Forward primer       | Reverse primer      |
|---------------|----------------------|---------------------|
| <i>ANGPT1</i> | TGCAATATGGATGTCAATGG | TATTCACCGGAGGGATTTC |
| <i>CACYBP</i> | GCCCTCCTATGACACTGAA  | TCCTTTGGCTTGCTTCTC  |
| <i>CSPG5</i>  | CCTTGGAGGTTTGGCTGA   | GGTGCCCTGAAATGGGT   |
| <i>FABP5</i>  | ACAGATGGTGCATTGGTTC  | TACAGGCGACATGGTTCA  |
| <i>FABP6</i>  | CAAGACGTTCAAGGCCACT  | GCTCACGCGCTCATAGG   |
| <i>GAL</i>    | GCCCTTCTGCCTCTGC     | TCGCTGAATGACCTGTGG  |
| <i>NDRG1</i>  | TGGTGGAGAAAGGGGAGA   | TGTGGTTCATGCCGATGT  |
| <i>NR6A1</i>  | ACTGCCTTCTTCTGCGA    | GCTGTAAACGGTGAGGGA  |
| <i>STC2</i>   | CGCGTTATCCTCGTACCT   | CCTCCCTGGTTCACCTC   |
| <i>GAPDH</i>  | CCTCCGTGTCCCACT      | GCCTGCTTCACCACCTTC  |
